# Supplementary material for: In vivo effects of the alpha-synuclein misfolding inhibitor minzasolmin supports clinical development in Parkinson’s disease
Source: PubMed Central journal article supplement (PMC10352257; doi:10.1038/s41531-023-00552-7), 2023-07-17
Supplement: 41531_2023_552_MOESM1_ESM.pdf [file 41531_2023_552_MOESM1_ESM.pdf]

SUPPLEMENTARY INFORMATION

Pharmacokinetic study of intraperitoneal administration of minzasolmin in wildtype mice

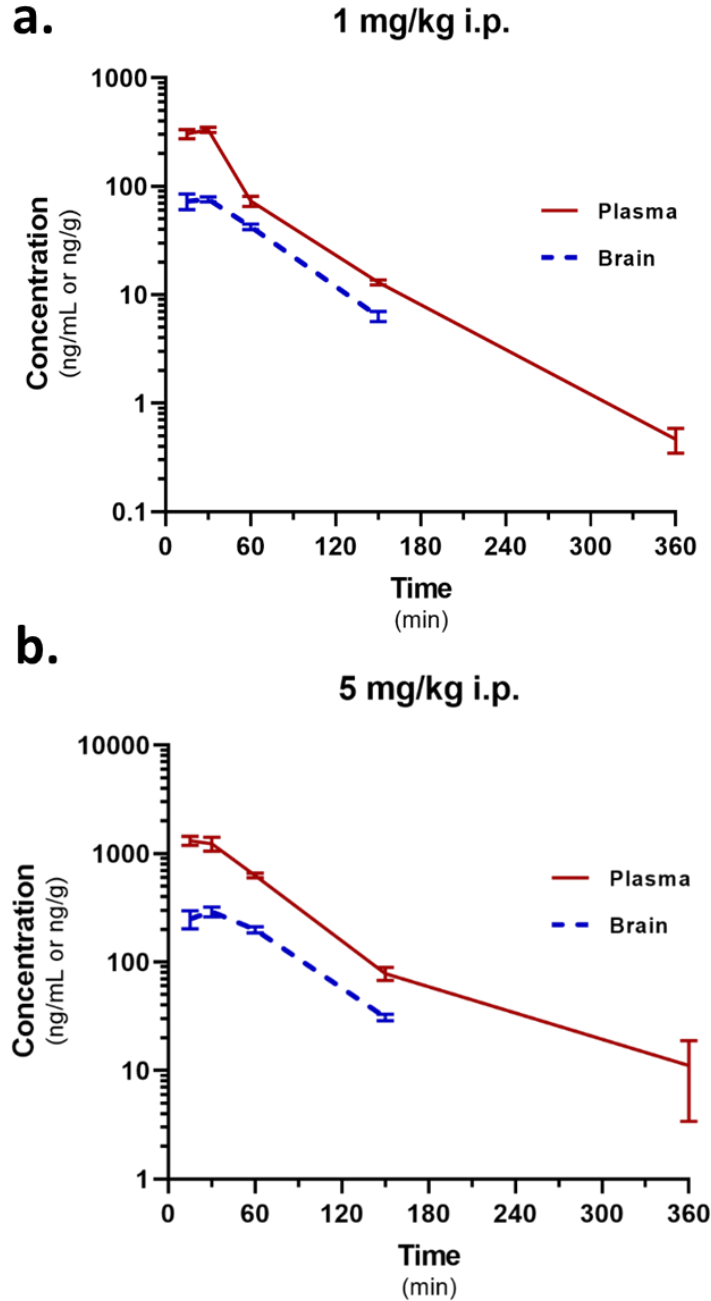

**Supplementary Figure 1.** Time-concentration curve profile (mean  $\pm$  SEM, n=3 per time point and dose; 30 mice total) of minzasolmin observed in plasma and brain following single intraperitoneal administration of (a) 1 or (b) 5 mg/kg to male C57BL/6 mice

### Evaluations of grip strength deficits of Line 61 transgenic mice

Baseline evaluations of grip strength were used to confirm a starting phenotype for Line 61 transgenic mice (*i.e.*, reduced grip strength compared to non-transgenic littermate controls) and informed pseudo randomization of subjects across treatment groups. Data are presented (**Supplementary Figure 2**) as mean  $\pm$  SEM.

First, an unpaired two-tailed t-test was used to evaluate grip strength of non-transgenic and Line 61 transgenic mice prior to treatment. There was a statistically significant decrease in Line 61 transgenic grip strength compared to non-transgenic mice (**Supplementary Figure 2a**; \*\*\*\* $P < 0.0001$  vs. non-transgenic mice;  $t = 11.29$ ,  $df = 84$ ), confirming that the Line 61 transgenic mice had existing grip strength deficits prior to study treatments.

To ensure appropriate distribution of subjects across treatment groups, evaluation of baseline grip strength was re-analyzed following treatment group assignment using a one-way ANOVA. Specific exclusions related to post-study genotype confirmation were documented and the group numbers for all baseline grip strength analyses were: Non-tg/Vehicle (39), Line 61 tg/Vehicle (14), Line 61 tg/1 mg/kg minzasolmin (16) and Line 61 tg/5 mg/kg minzasolmin (17). There was a statistically significant difference in grip strength of vehicle-treated Line 61 transgenic compared to non-transgenic mice (**Supplementary Figure 2b**; \*\*\* $P < 0.0001$  vs. non-transgenic mice). There were no statistically significant differences between the vehicle and minzasolmin - treated Line 61 transgenic groups, indicating an appropriate treatment group distribution of transgenic subjects.

Grip strength was reassessed following treatments with vehicle or minzasolmin (**Supplementary Figure 2c**) using a two-way repeated measures ANOVA. Specific exclusions related to genotype confirmation, health and test issues, and study deaths prior to re-test were documented. The group numbers for this analysis were: Non-tg/Vehicle (39), Line 61 tg/Vehicle (11), Line 61 tg/1 mg/kg minzasolmin (14) and Line 61 tg/5 mg/kg minzasolmin (13). There was a statistically significant interaction of treatment group x time ( $P = 0.0149$ ;  $F(7,73) = 3.727$ ), and *post hoc* comparisons via Dunnett's multiple comparisons test revealed statistically significant differences in grip strength between vehicle-treated Line 61 transgenic compared to non-transgenic mice at baseline and re-test (\*\* $P < 0.01$  vs. non-transgenic mice). There were no statistically significant differences between the vehicle-treated Line 61 transgenic group and any other transgenic treatment group.

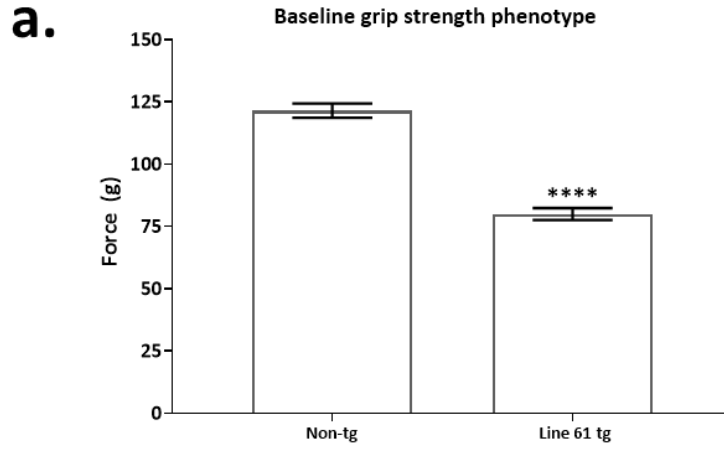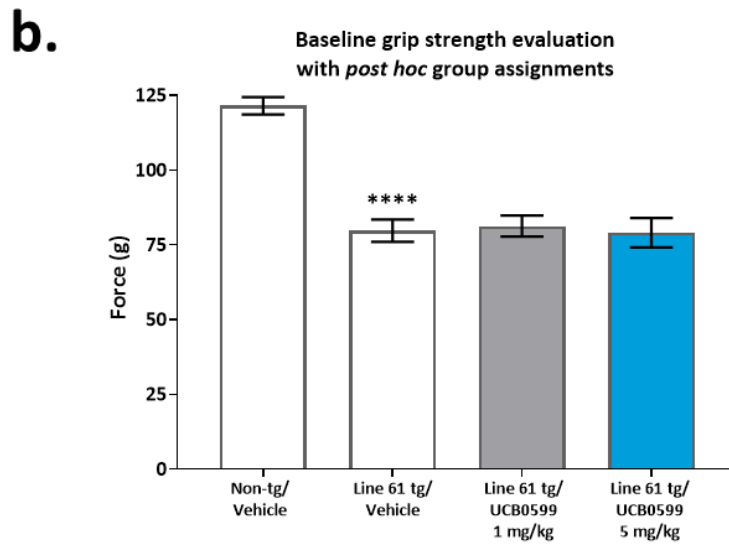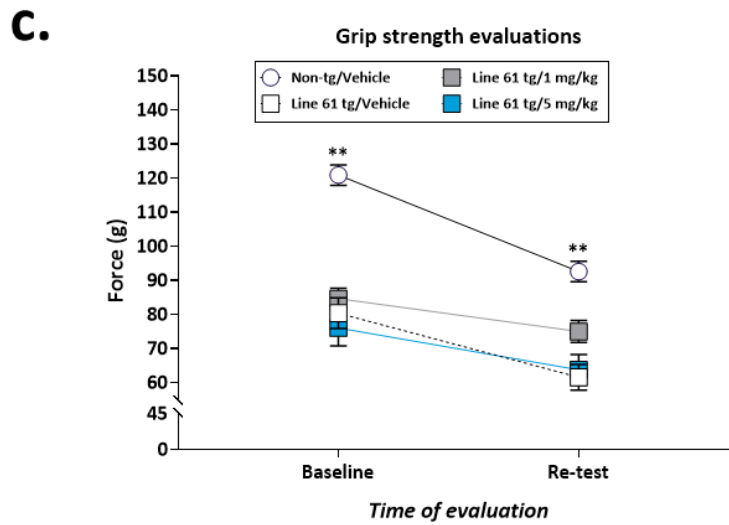

## **Supplementary Figure 2. Baseline and post-treatment evaluations of Line 61 grip strength deficits**

Baseline evaluations of grip strength prior to starting treatments were used to **(a)** confirm grip strength deficits in Line 61 transgenic mice compared to non-transgenic mice ( $****P < 0.0001$  vs. *non-transgenic mice*) and **(b)** ensure the appropriate distribution of subjects across assigned treatment groups ( $***P < 0.0001$  *Line 61 tg vs. non-transgenic vehicle-control mice*); there were no statistically significant differences between the vehicle and minzasolmin-treated Line 61 transgenic groups). Post-treatment reassessment of grip strength **(c)** revealed statistically significant differences in grip strength between vehicle-treated Line 61 transgenic compared to non-transgenic mice at baseline and re-test ( $**P < 0.01$  vs. *non-transgenic mice*). There were no statistically significant differences between the vehicle-treated Line 61 transgenic group and any other transgenic treatment group. Data are presented as mean  $\pm$  SEM.

### Assessment of drug interference by ASYN ELISA

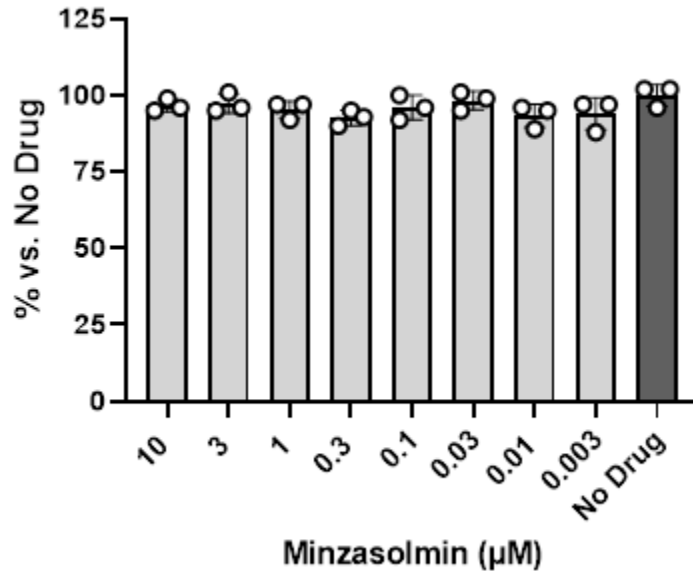

### Supplementary Figure 3. Minzasolmin does not interfere with SYN-1 antibody binding

Minzasolmin was titrated in combination with the SYN-1 antibody to monitor drug interference in an ELISA assay. Dose-related trends in antibody binding were not observed and statistically meaningful differences between ELISA signal at different compound concentrations were not detected by ANOVA (mean  $\pm$  SD, n=3 per condition).

**SUPPLEMENTARY TABLES**

**Supplementary Table 1. Summary of statistics for neuropathological endpoints**

| <b>Pathology Endpoint</b> | <b>Region</b>      | <b>Main ANOVA P Value</b> | <b>F</b> | <b>Degrees of Freedom (DFn, DFd)</b> | <b>R<sup>2</sup></b> |
|---------------------------|--------------------|---------------------------|----------|--------------------------------------|----------------------|
| <b>Total ASYN</b>         | <b>Cortex</b>      | <0.0001                   | 78.51    | 3,75                                 | 0.7585               |
|                           | <b>Hippocampus</b> | <0.0001                   | 93.51    | 3,75                                 | 0.7891               |
|                           | <b>Striatum</b>    | <0.0001                   | 87.32    | 3,75                                 | 0.7774               |
| <b>Proteinase K+ ASYN</b> | <b>Cortex</b>      | <0.0001                   | 15.96    | 2, 37                                | 0.4631               |
|                           | <b>Hippocampus</b> | <0.0001                   | 33.71    | 2, 37                                | 0.6457               |
|                           | <b>Striatum</b>    | <0.0001                   | 37.56    | 2, 37                                | 0.67                 |
| <b>DAT</b>                | <b>Striatum</b>    | <0.0001                   | 14.68    | 3, 75                                | 0.3699               |
| <b>GFAP</b>               | <b>Cortex</b>      | <0.0001                   | 74.23    | 3, 75                                | 0.7481               |
|                           | <b>Hippocampus</b> | <0.0001                   | 70.43    | 3, 75                                | 0.738                |

**Supplementary Table 2. Summary of statistics for Total ASYN pathology**

|                                                | <b>Region</b>      | <b>Mean</b> | <b>SEM</b> | <b>N</b> | <b>Adjusted P Value (vs. control group)</b> | <b>Confidence interval of mean</b> |
|------------------------------------------------|--------------------|-------------|------------|----------|---------------------------------------------|------------------------------------|
| <b>Non-tg/<br/>Vehicle</b>                     | <b>Cortex</b>      | 85.64       | 9.887      | 39       |                                             | 65.63 to 105.7                     |
|                                                | <b>Hippocampus</b> | 100.0       | 9.908      | 39       |                                             | 79.97 to 120.1                     |
|                                                | <b>Striatum</b>    | 102.4       | 9.927      | 39       |                                             | 82.31 to 122.5                     |
| <b>Line 61 tg/<br/>Vehicle</b>                 | <b>Cortex</b>      | 352.8       | 16.60      | 10       | <0.0001                                     | 315.3 to 390.3                     |
|                                                | <b>Hippocampus</b> | 392.9       | 10.70      | 10       | <0.0001                                     | 368.7 to 417.1                     |
|                                                | <b>Striatum</b>    | 365.3       | 16.22      | 10       | <0.0001                                     | 328.6 to 402.0                     |
| <b>Line 61 tg/<br/>1 mg/kg<br/>minzasolmin</b> | <b>Cortex</b>      | 282.1       | 10.75      | 15       | 0.0148                                      | 259.1 to 305.2                     |
|                                                | <b>Hippocampus</b> | 286.7       | 11.79      | 15       | <0.0001                                     | 261.5 to 312.0                     |
|                                                | <b>Striatum</b>    | 265.4       | 9.001      | 15       | <0.0001                                     | 246.1 to 284.7                     |
| <b>Line 61 tg/<br/>5 mg/kg<br/>minzasolmin</b> | <b>Cortex</b>      | 232.8       | 18.81      | 15       | <0.0001                                     | 192.5 to 273.1                     |
|                                                | <b>Hippocampus</b> | 229.7       | 15.78      | 15       | <0.0001                                     | 195.8 to 263.5                     |
|                                                | <b>Striatum</b>    | 245.5       | 10.74      | 15       | <0.0001                                     | 222.4 to 268.5                     |

**Supplementary Table 3. Summary of statistics for Proteinase K-resistant ASYN pathology**

| <b>Group</b>                                   | <b>Region</b>      | <b>Mean</b> | <b>SEM</b> | <b>N</b> | <b>Adjusted P Value (vs. control group)</b> | <b>Confidence interval of mean</b> |
|------------------------------------------------|--------------------|-------------|------------|----------|---------------------------------------------|------------------------------------|
| <b>Line 61 tg/<br/>Vehicle</b>                 | <b>Cortex</b>      | 242.5       | 9.062      | 10       |                                             | 222.0 to 263.0                     |
|                                                | <b>Hippocampus</b> | 270.1       | 8.574      | 10       |                                             | 250.7 to 289.5                     |
|                                                | <b>Striatum</b>    | 266.7       | 7.079      | 10       |                                             | 250.7 to 282.7                     |
| <b>Line 61 tg/<br/>1 mg/kg<br/>minzasolmin</b> | <b>Cortex</b>      | 180.6       | 7.575      | 15       | <0.0001                                     | 164.4 to 196.8                     |
|                                                | <b>Hippocampus</b> | 176.6       | 8.087      | 15       | <0.0001                                     | 159.3 to 193.9                     |
|                                                | <b>Striatum</b>    | 176.1       | 7.989      | 15       | <0.0001                                     | 159.0 to 193.3                     |
| <b>Line 61 tg/<br/>5 mg/kg<br/>minzasolmin</b> | <b>Cortex</b>      | 187.3       | 7.153      | 15       | <0.0001                                     | 172.0 to 202.7                     |
|                                                | <b>Hippocampus</b> | 178.3       | 8.452      | 15       | <0.0001                                     | 160.1 to 196.4                     |
|                                                | <b>Striatum</b>    | 182.2       | 7.081      | 15       | <0.0001                                     | 167.0 to 197.4                     |



**Supplementary Table 4. Summary of statistics for DAT immunolabeling evaluation in dorsal striatum**

| <b>Group</b>                                   | <b>Mean</b> | <b>SEM</b> | <b>N</b> | <b>Adjusted P Value (vs. control group)</b> | <b>Confidence interval of mean</b> |
|------------------------------------------------|-------------|------------|----------|---------------------------------------------|------------------------------------|
| <b>Non-tg/<br/>Vehicle</b>                     | 292.1       | 5.555      | 39       |                                             | 280.9 to 303.3                     |
| <b>Line 61 tg/<br/>Vehicle</b>                 | 211.2       | 12.90      | 10       | <0.0001                                     | 182.0 to 240.4                     |
| <b>Line 61 tg/<br/>1 mg/kg<br/>minzasolmin</b> | 255.3       | 10.03      | 15       | 0.0117                                      | 233.8 to 276.8                     |
| <b>Line 61 tg/<br/>1 mg/kg<br/>minzasolmin</b> | 280.1       | 8.932      | 15       | <0.0001                                     | 260.9 to 299.2                     |

**Supplementary Table 5.** Summary of statistics for GFAP immunolabeling evaluations

| <b>Group</b>                                   | <b>Region</b>      | <b>Mean</b> | <b>SEM</b> | <b>N</b> | <b>Adjusted P Value (vs. control group)</b> | <b>Confidence interval of mean</b> |
|------------------------------------------------|--------------------|-------------|------------|----------|---------------------------------------------|------------------------------------|
| <b>Non-tg/<br/>Vehicle</b>                     | <b>Cortex</b>      | 112.2       | 2.882      | 39       |                                             | 106.3 to 118.0                     |
|                                                | <b>Hippocampus</b> | 220.1       | 3.319      | 39       |                                             | 213.4 to 226.8                     |
| <b>Line 61 tg/<br/>Vehicle</b>                 | <b>Cortex</b>      | 223.1       | 8.295      | 10       | <0.0001                                     | 204.3 to 241.9                     |
|                                                | <b>Hippocampus</b> | 350.8       | 13.91      | 10       | <0.0001                                     | 213.4 to 226.8                     |
| <b>Line 61 tg/<br/>1 mg/kg<br/>minzasolmin</b> | <b>Cortex</b>      | 155.9       | 6.469      | 15       | <0.0001                                     | 142.0 to 169.7                     |
|                                                | <b>Hippocampus</b> | 271.6       | 7.448      | 15       | <0.0001                                     | 255.6 to 287.6                     |
| <b>Line 61 tg/<br/>1 mg/kg<br/>minzasolmin</b> | <b>Cortex</b>      | 169.3       | 7.241      | 15       | <0.0001                                     | 153.8 to 184.9                     |
|                                                | <b>Hippocampus</b> | 289.7       | 7.337      | 15       | <0.0001                                     | 273.9 to 305.4                     |
